# Supplementary material for: Growth of robust metal–organic framework films by spontaneous oxidation of a metal substrate for NO2 sensing
Source: Royal Society of Chemistry journal article supplement (doi:10.1039/d1qm00626f), 2021-01-01
Supplement: d1qm00626f1.pdf [file d1qm00626f1.pdf]

## Growth of Robust Metal-Organic Framework Films by Spontaneous Oxidation of Metal Substrate for NO<sub>2</sub> Sensing

Jun Zhang<sup>ab\*</sup>, Enlai Hu<sup>b</sup>, Fang Liu<sup>a</sup>, Hongjun Li<sup>b</sup> and Tifeng Xia<sup>a\*</sup>

<sup>a</sup> Institute of Materials, China Academy of Engineering Physics, Mianyang 621907, China. E-mail: [j-zhang@caep.cn](mailto:j-zhang@caep.cn), [xiatifeng@caep.cn](mailto:xiatifeng@caep.cn).

<sup>b</sup> State Key Laboratory of Silicon Materials, Cyrus Tang Center for Sensor Materials and Applications, School of Material Science and Engineering, Zhejiang University, Hangzhou 310027, China.

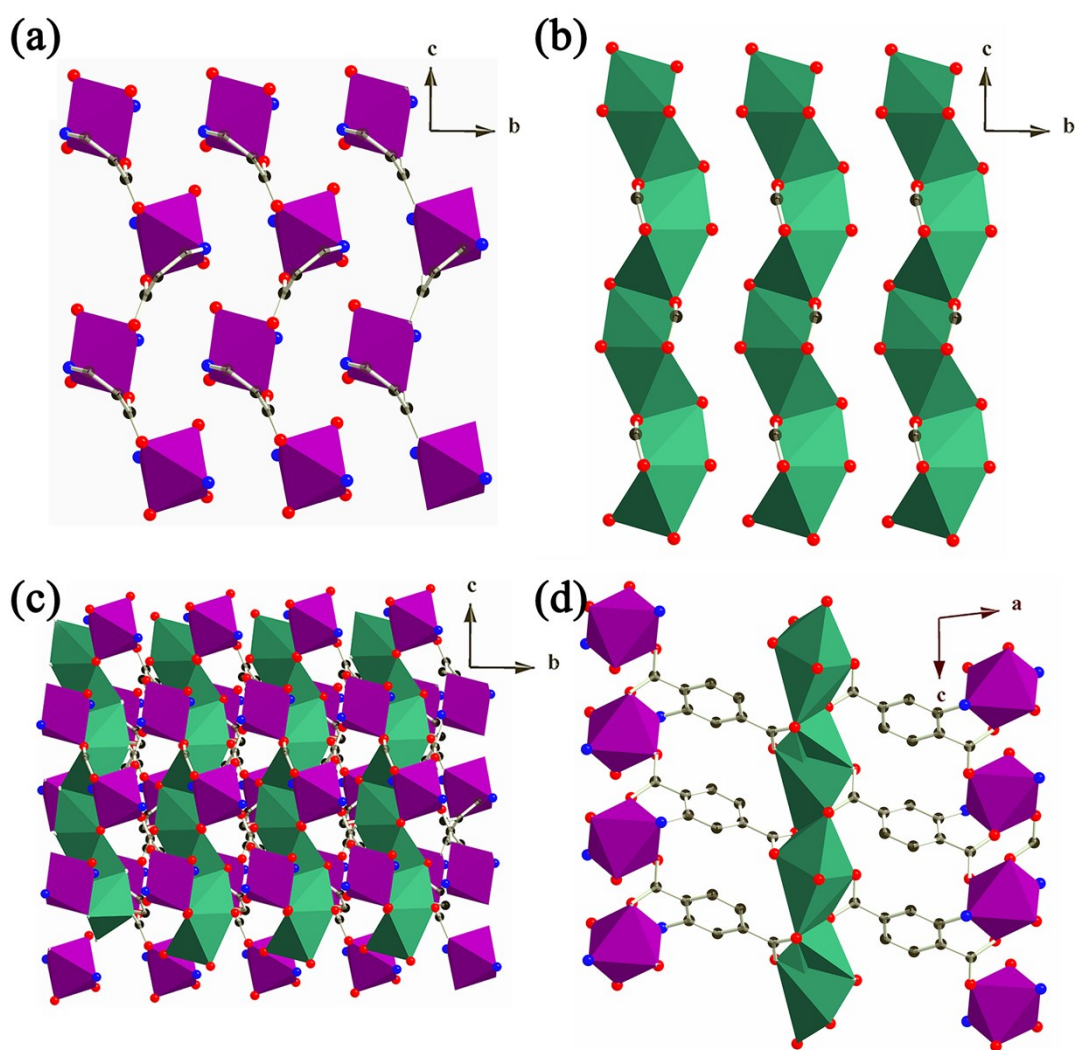

Figure S1. Crystal structure of ZJU-66.

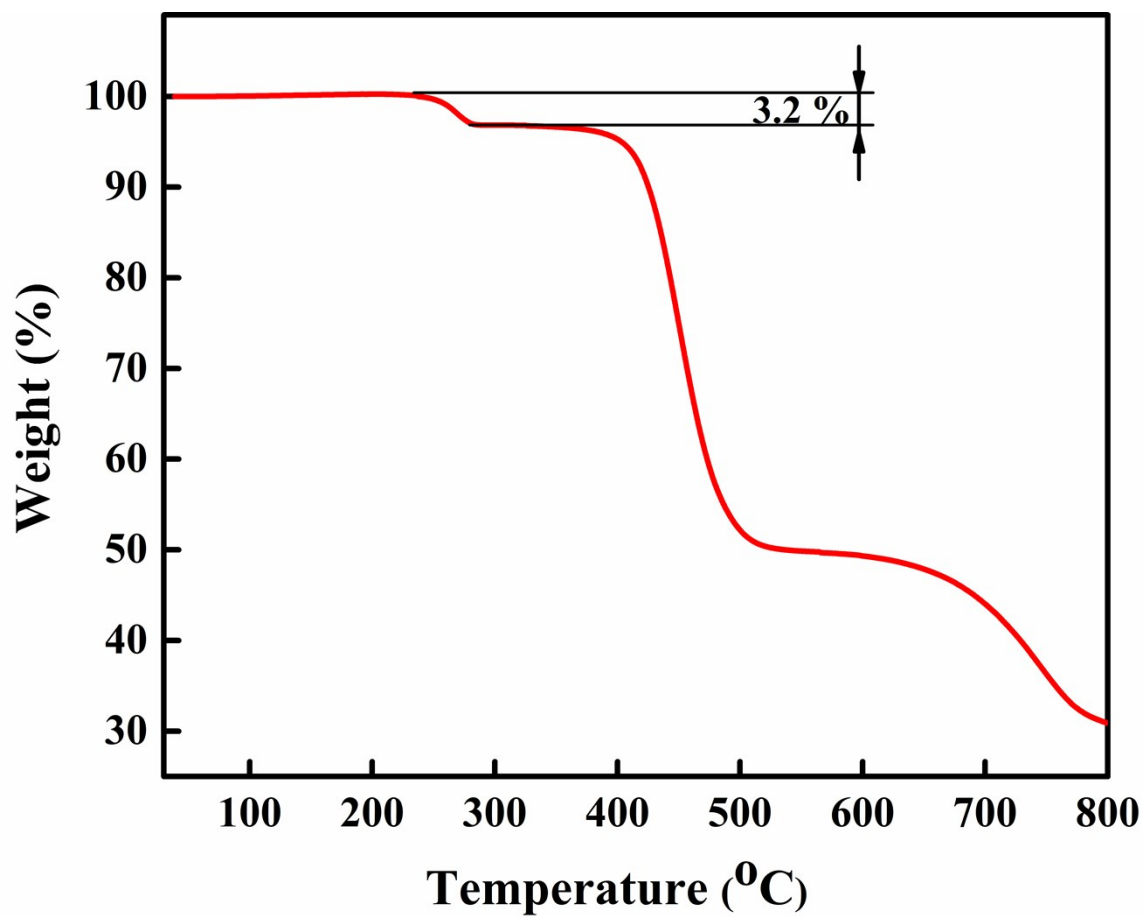

**Figure S2.** Thermal gravimetric analysis curves of ZJU-66

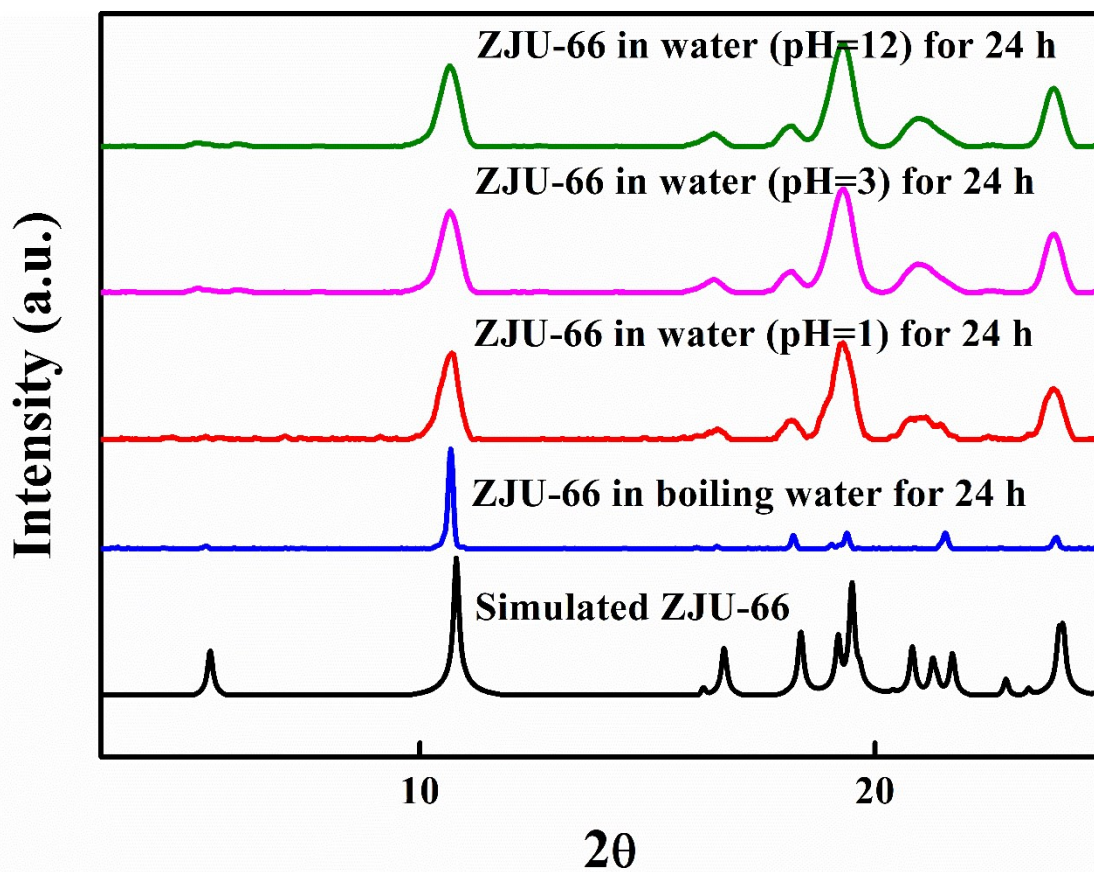

**Figure S3.** The XRD pattern of ZJU-66 after immersing in boiling water, acid solutions and basic solution for 24 h.

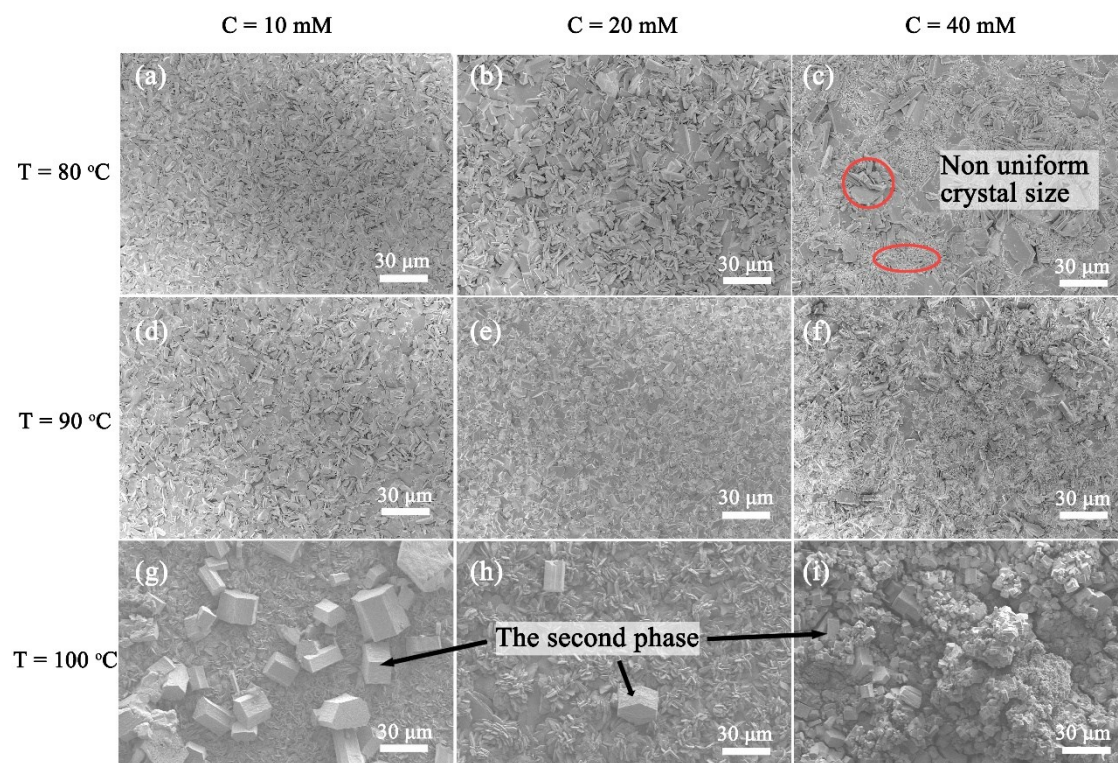

**Figure S4.** SEM images of ZJU-66 film supported on Zn metal plates prepared in the solvothermal solution with different concentrations of BDC-NH<sub>2</sub> and different temperature.

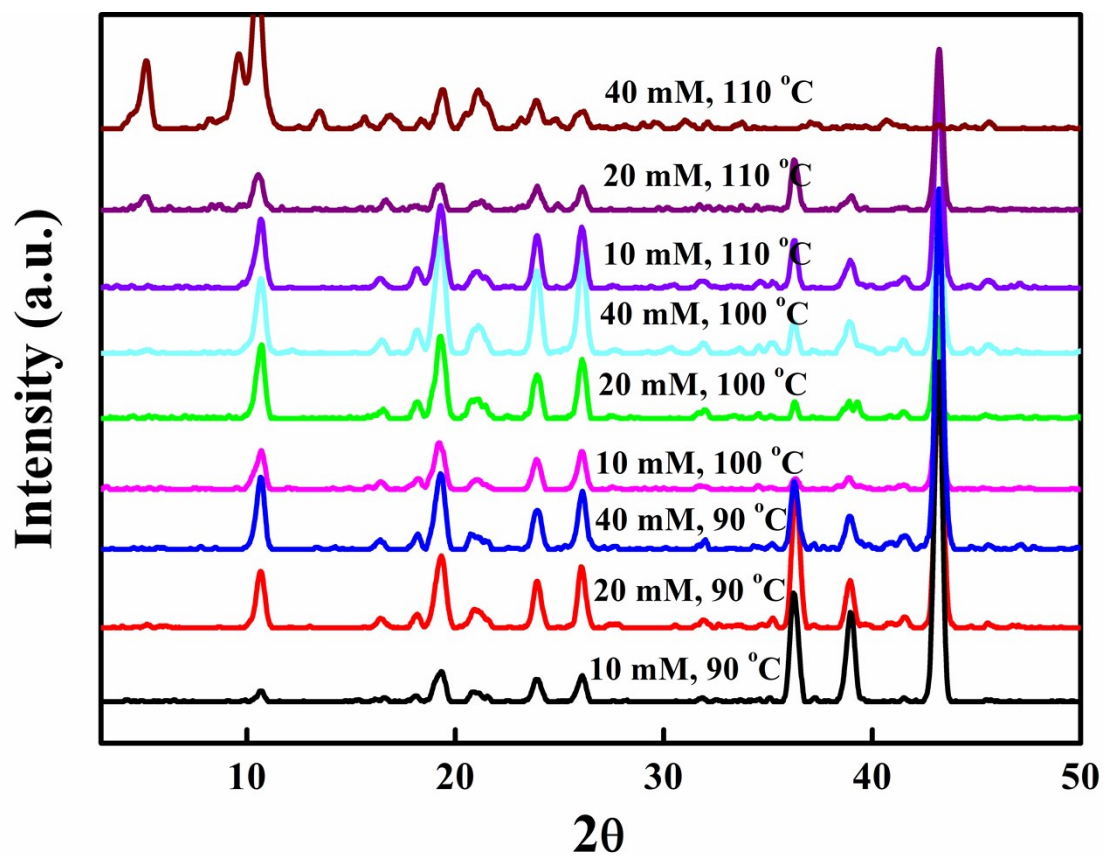

**Figure S5.** XRD patterns of as-synthesized ZJU-66 films at different ligand concentrations and temperature.

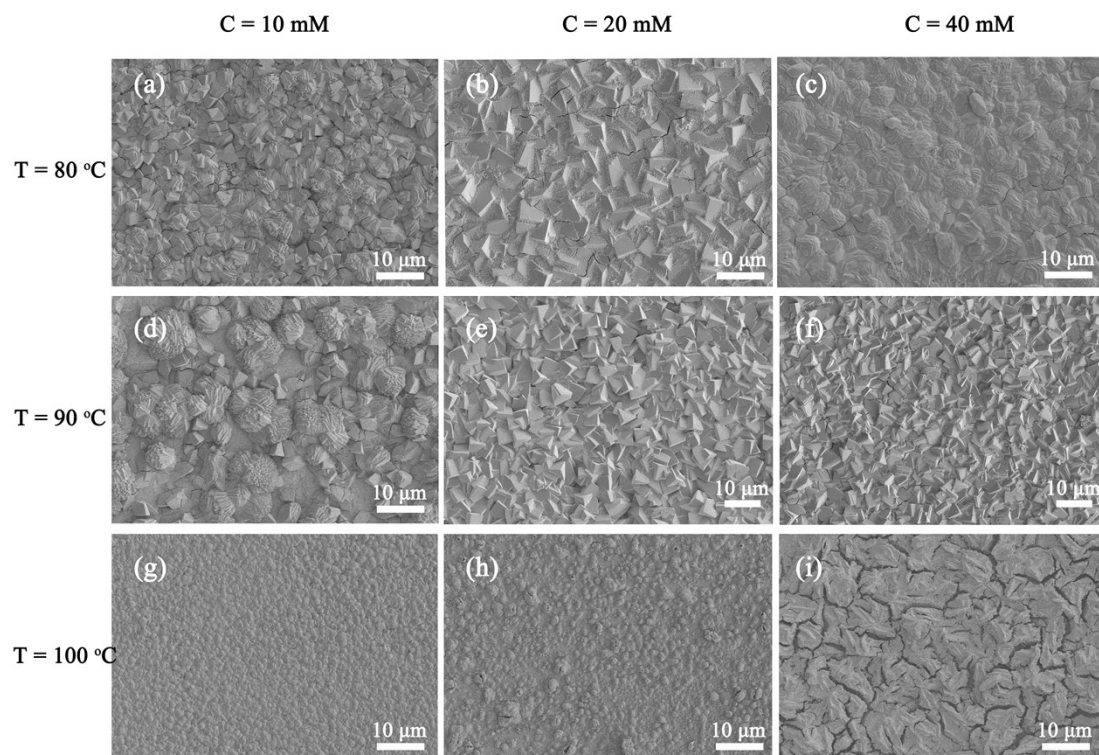

**Figure S6.** SEM images of MOF-5-(OH)<sub>2</sub> films supported on Zn metal plates prepared in the solvothermal solution with different concentrations of BDC-(OH)<sub>2</sub> and different temperature.

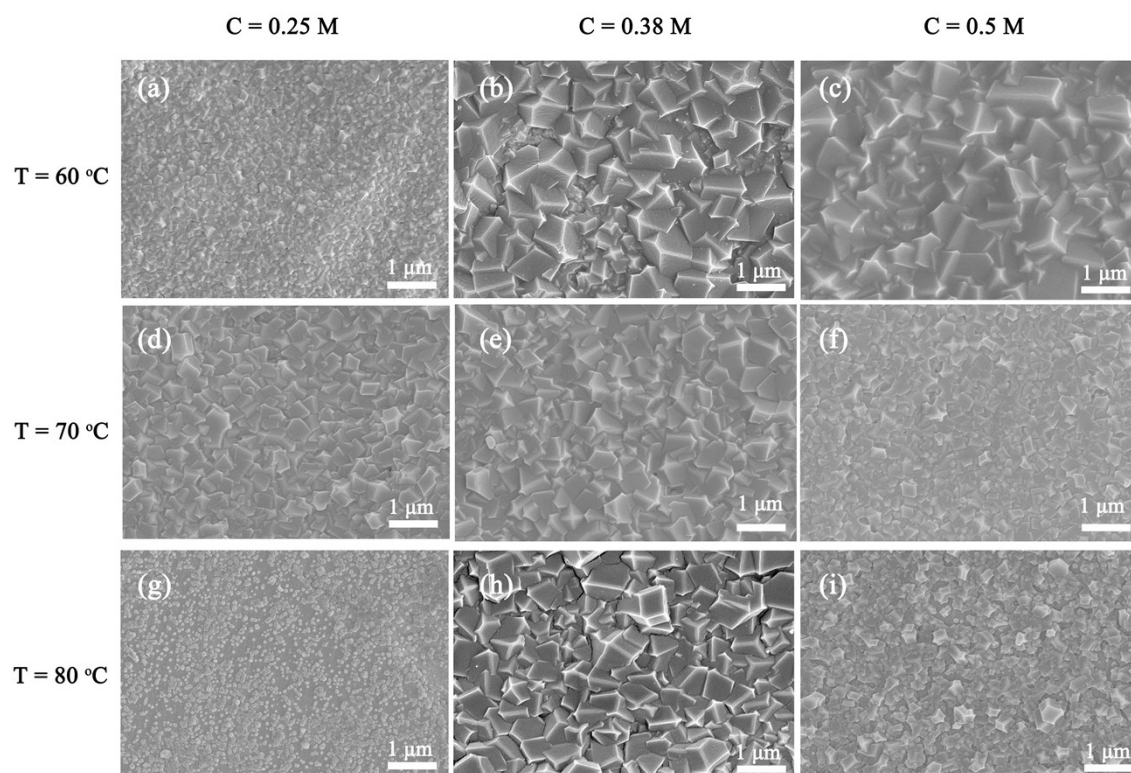

**Figure S7.** SEM images of ZIF-8 films supported on Zn metal plates prepared in the solvothermal solution with different concentrations of 2-MIM and different temperature.

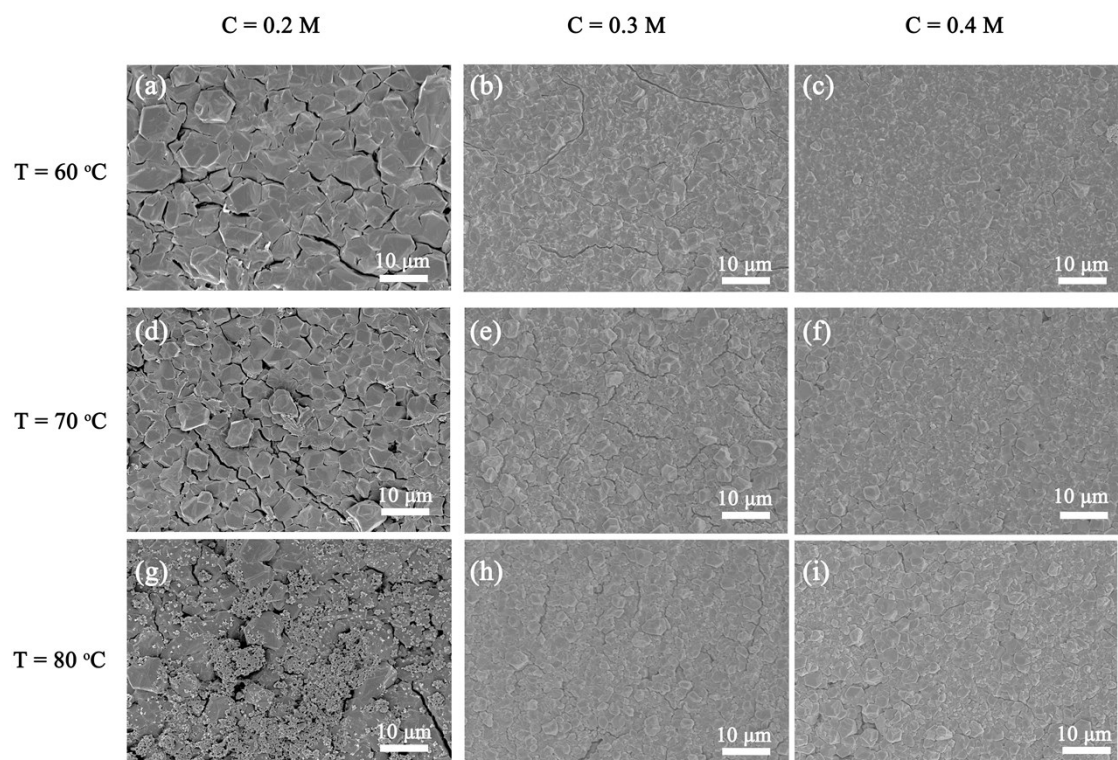

**Figure S8.** SEM images of ZIF-65 films supported on Zn metal plates prepared in the solvothermal solution with different concentrations of 2-NIM and different temperature.



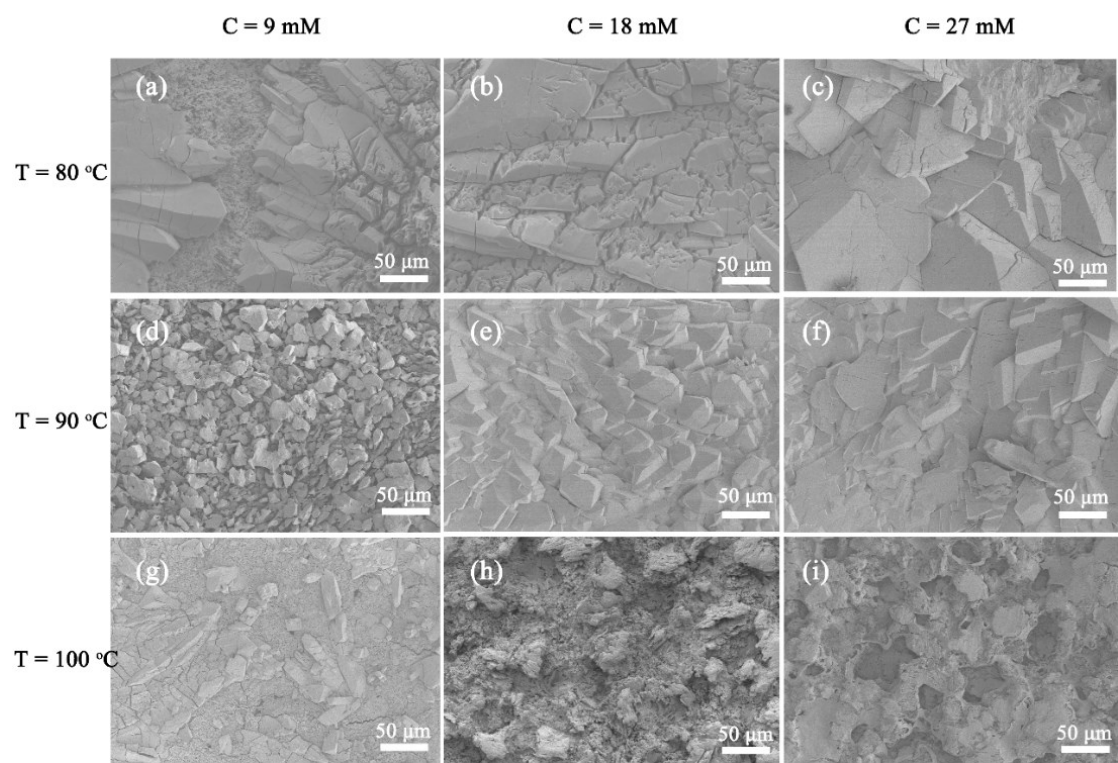

**Figure S9.** SEM images of Zn-BDC-COOH films supported on Zn metal plates prepared in the solvothermal solution with different concentrations of BDC-COOH and different temperature.

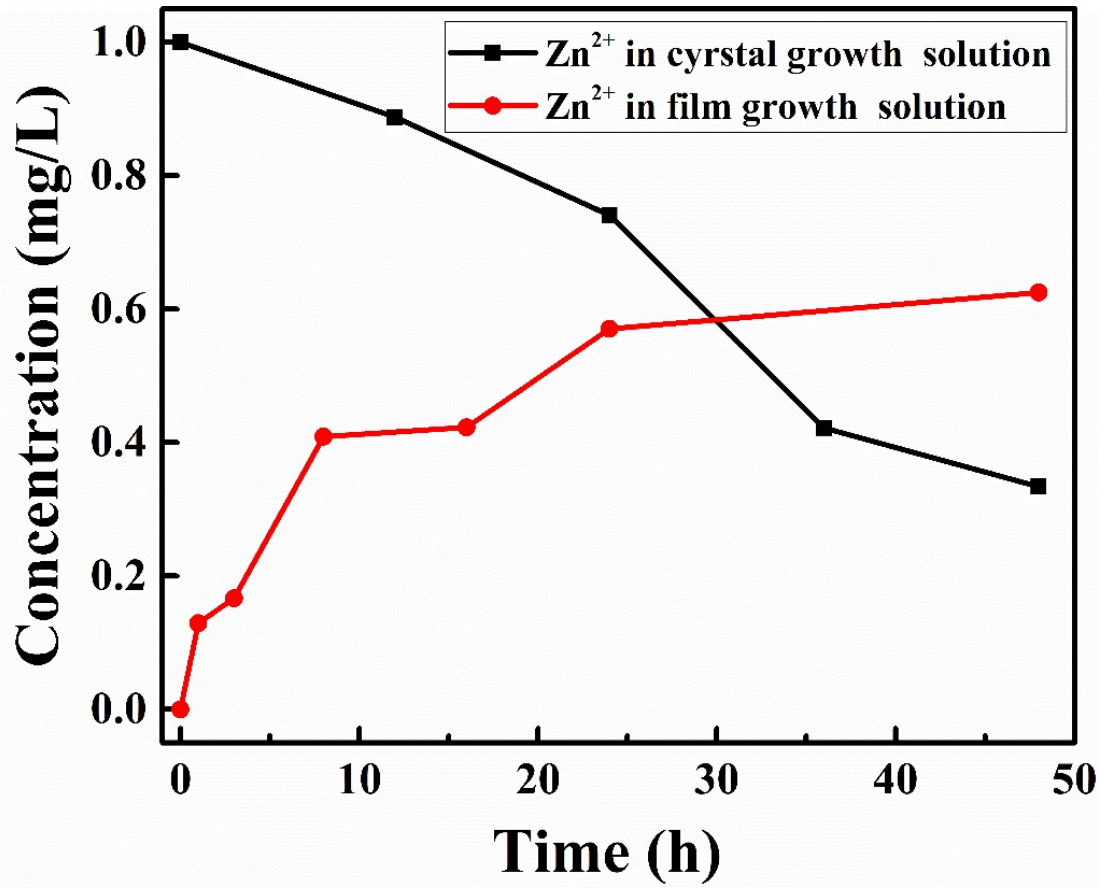

**Figure S10.** Zn<sup>2+</sup> ions concentrations in Zn-BDC-COOH film growth solution and Zn-BDC-COOH crystal growth solution.

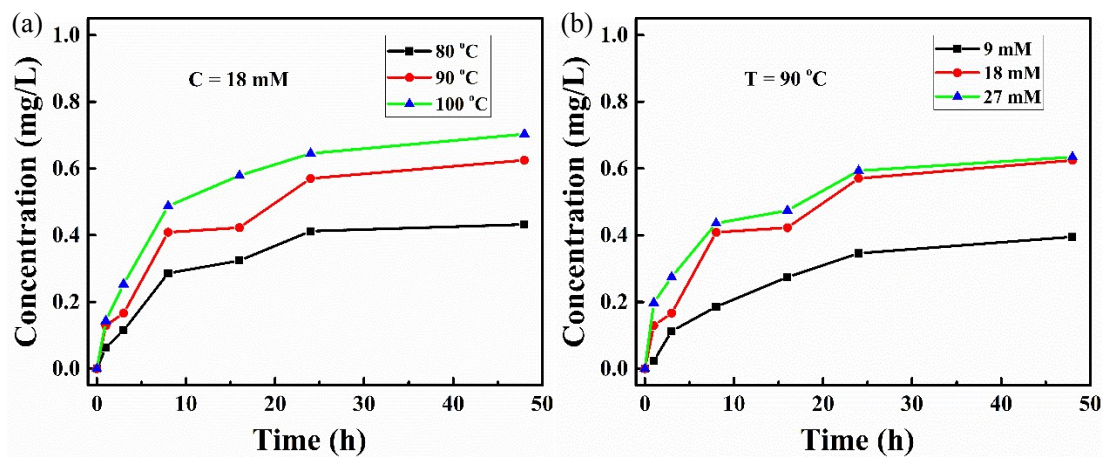

**Figure S11.** Zn<sup>2+</sup> ions concentrations in Zn-BDC-COOH film growth solution with different (a) temperature and (b) ligand concentrations.

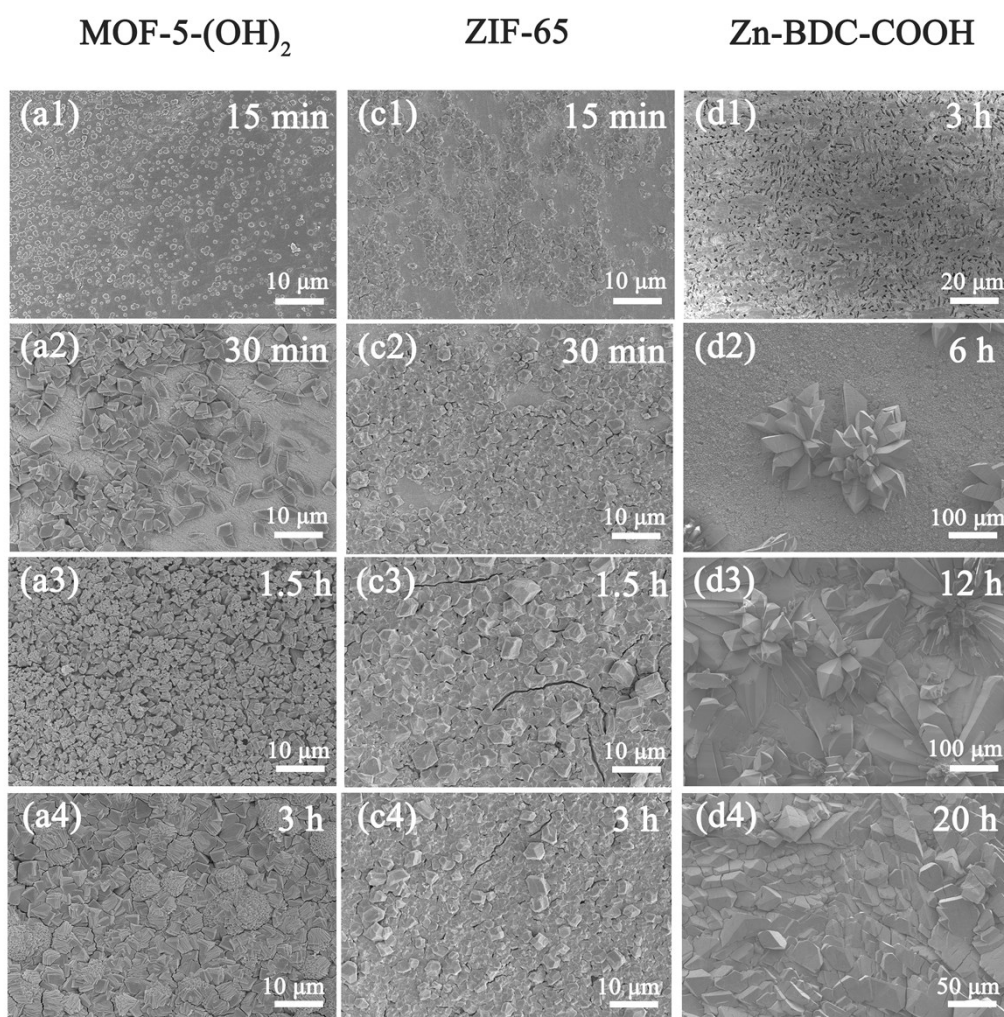

**Figure S12.** SEM images of MOF-5-(OH)<sub>2</sub>, ZIF-65 and Zn-BDC-COOH films supported on Zn metal plates prepared in the organic linker solutions after different growth times.

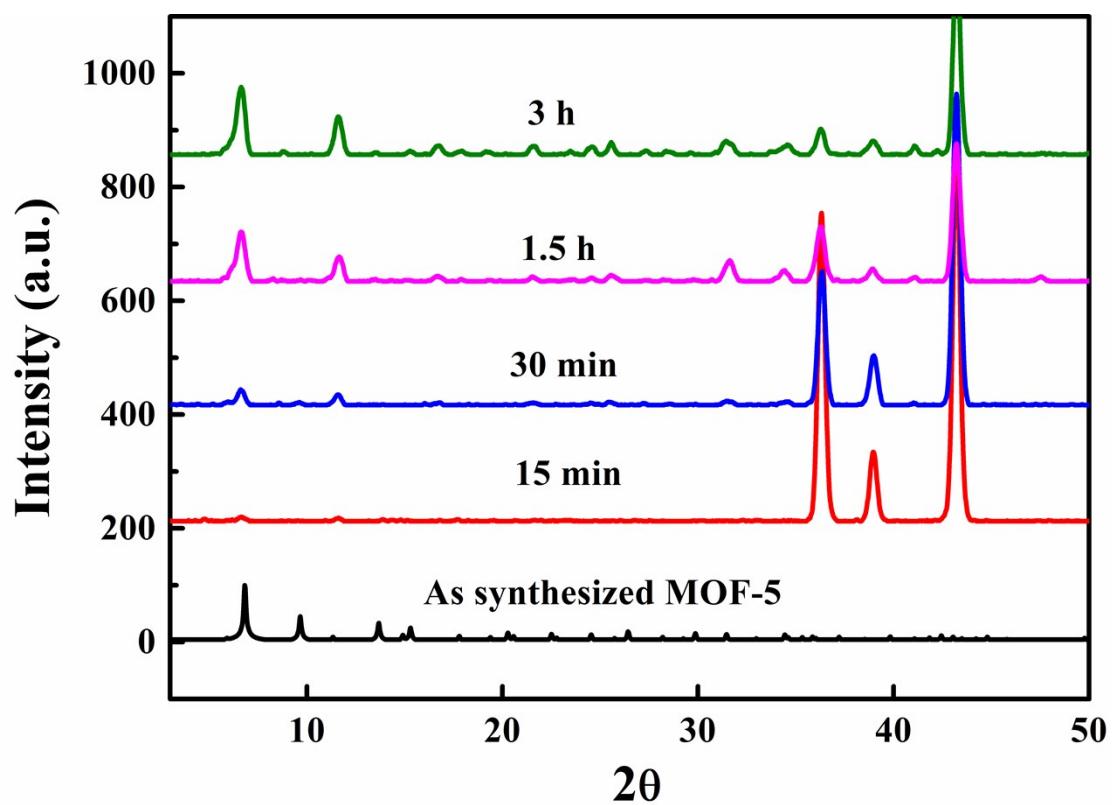

**Figure S13.** The XRD patterns of MOF-5-(OH)<sub>2</sub> films on zinc metal plates at different growth times.

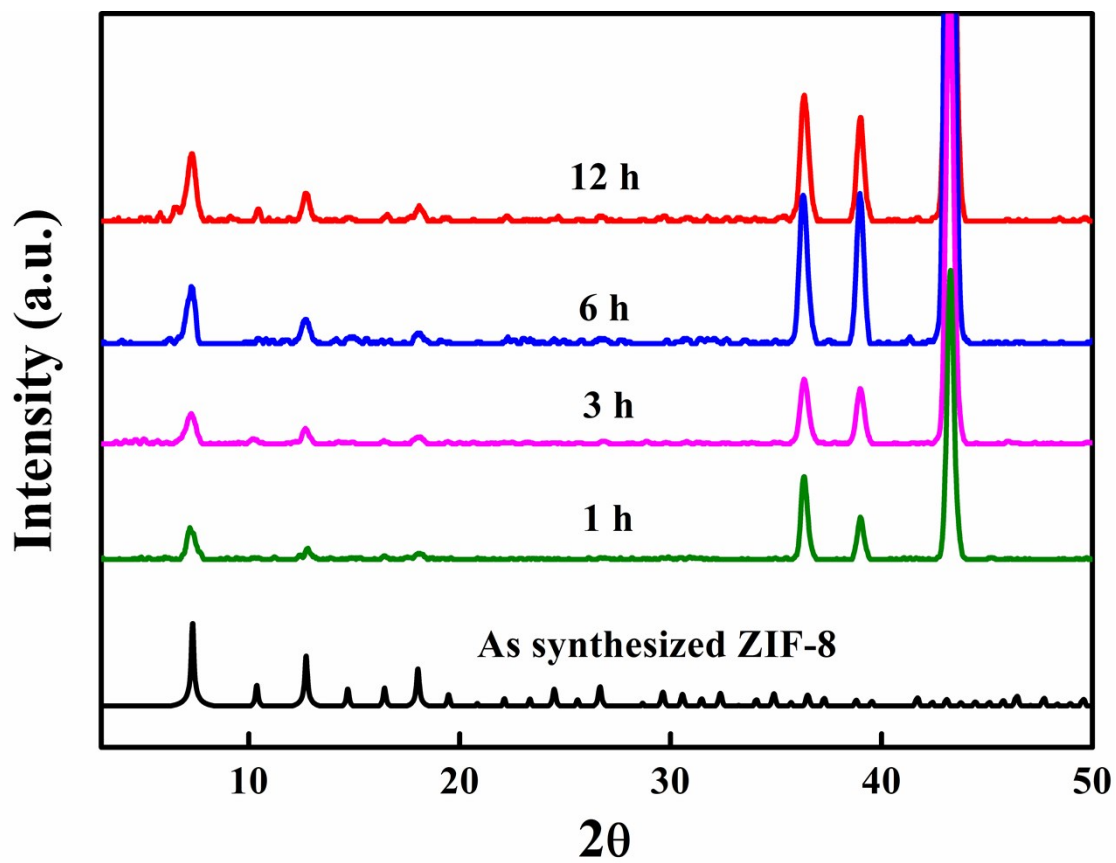

**Figure S14.** The XRD patterns of ZIF-8 films on zinc metal plates at different growth times.

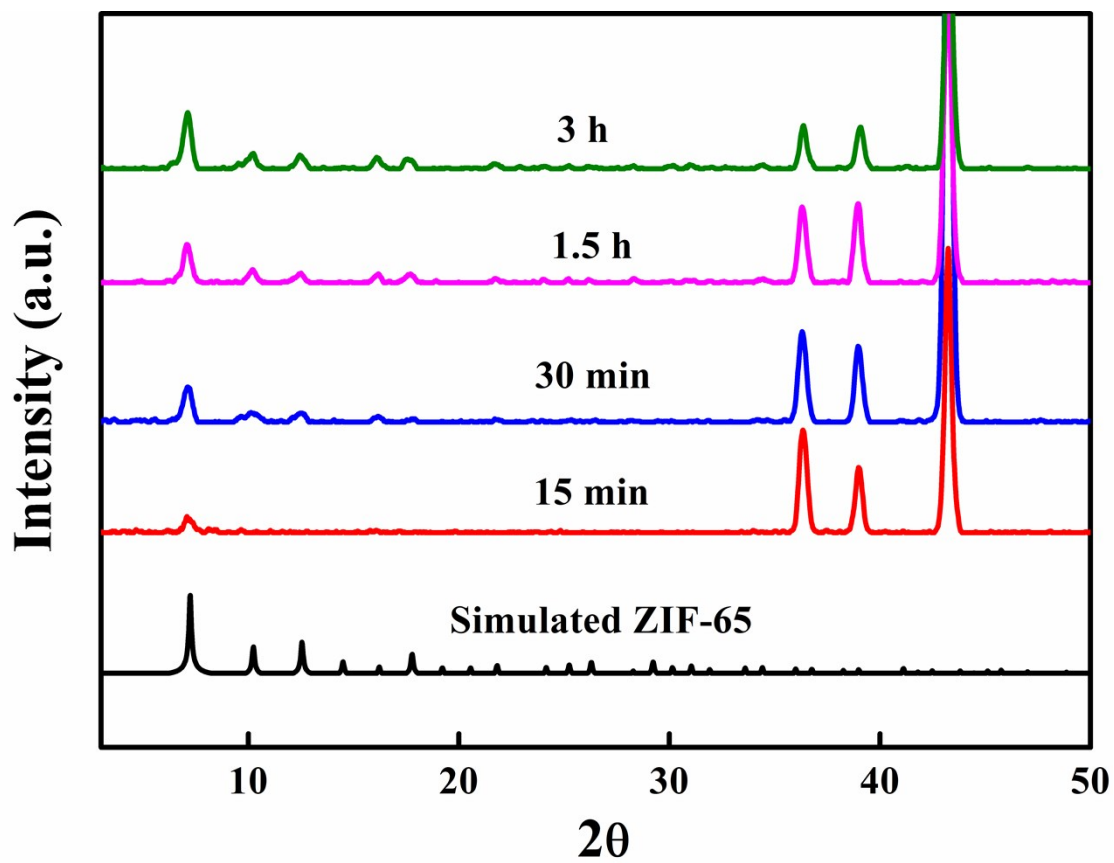

**Figure S15.** The XRD patterns of ZIF-65 films on zinc metal plates at different growth times.

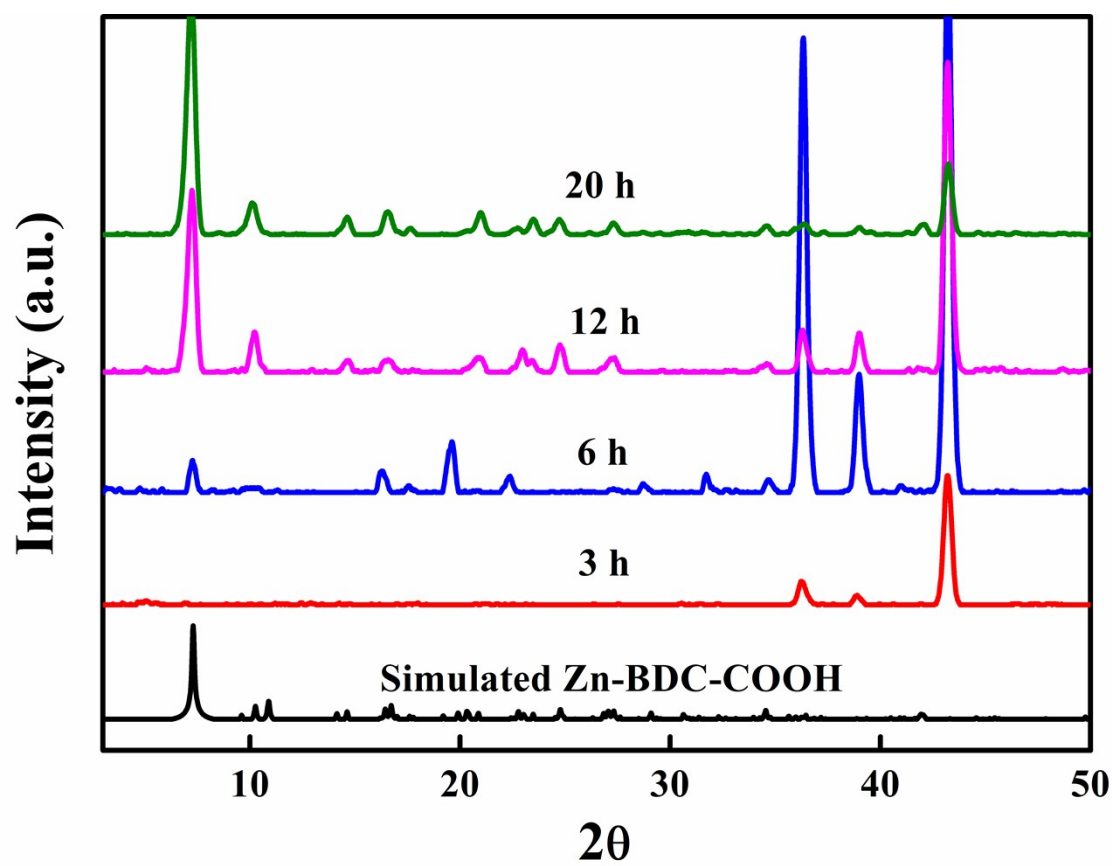

**Figure S16.** The XRD patterns of Zn-BDC-COOH films on zinc metal plates at different growth times.



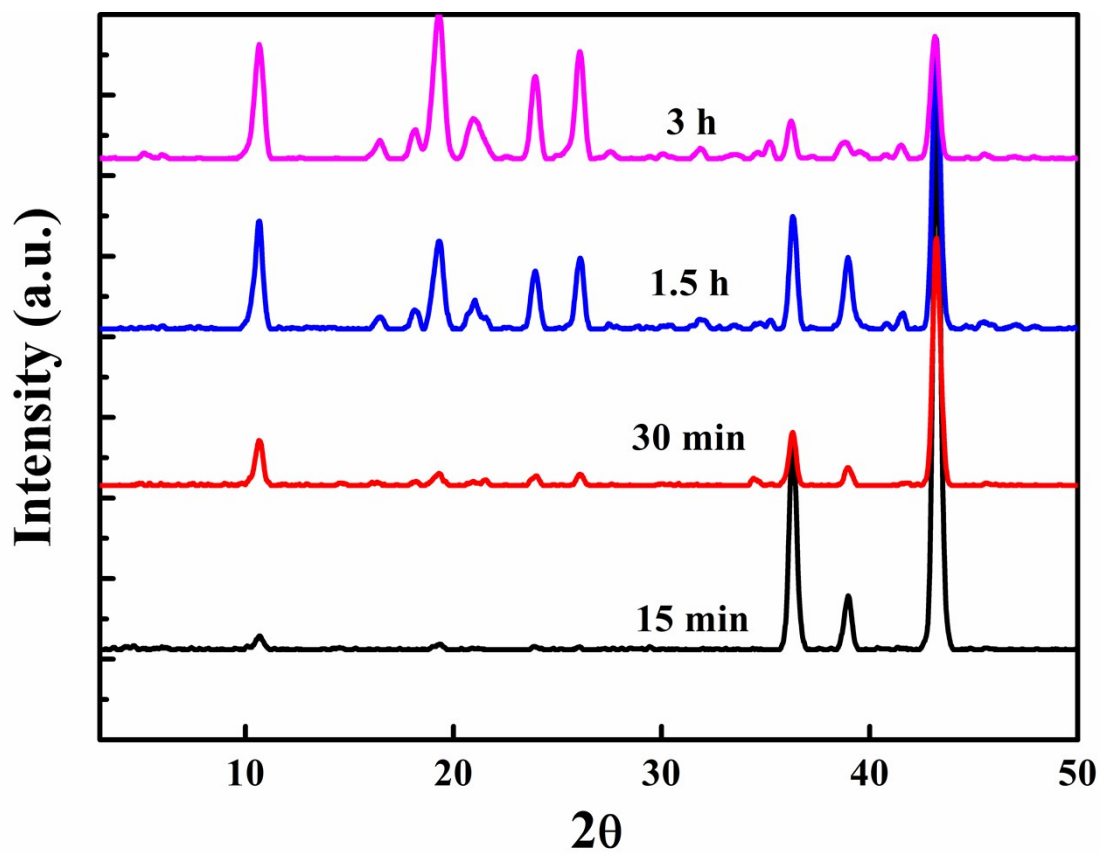

Figure S17. The XRD patterns of ZJU-66 films on zinc metal plates at different growth times.

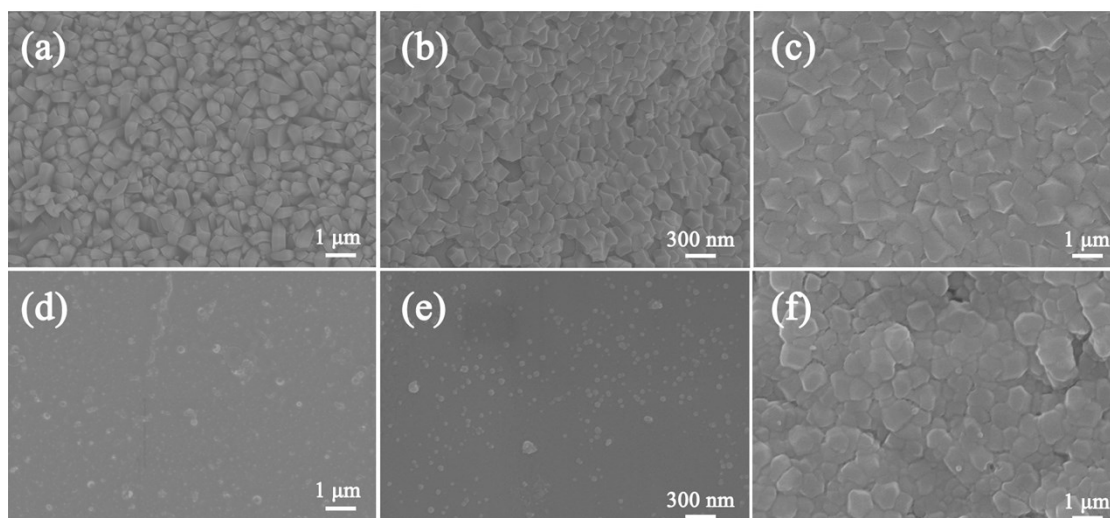

**Figure S18.** SEM images of ZIF-8 films synthesized on modified glass slides (a), silicon substrates (b) and metal plates (c); SEM images of ZIF-8 films on modified glass slides (d), silicon substrates (e) and metal plates (f) after corrosion treatments (put in NO<sub>2</sub> gas overnight and then sonicated for 30 minutes).

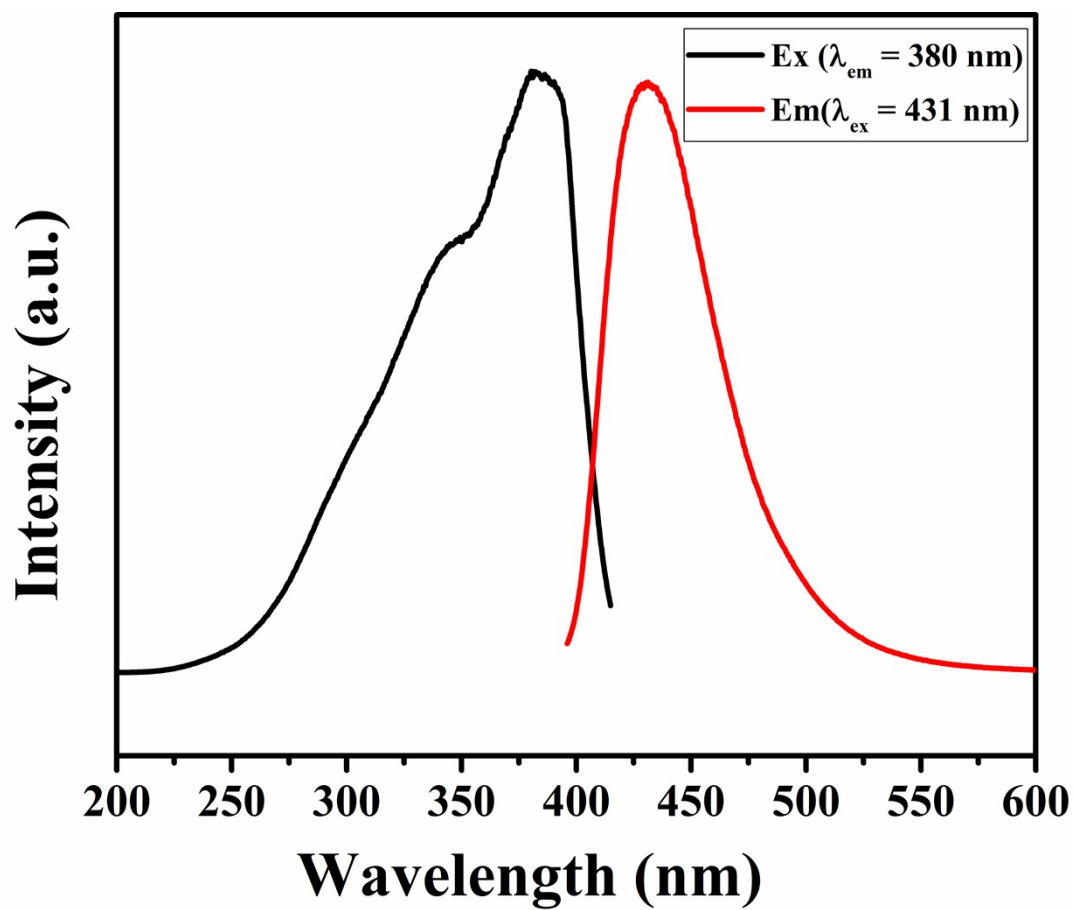

**Figure S19.** Fluorescence excitation and emission spectra of ZJU-66 film.

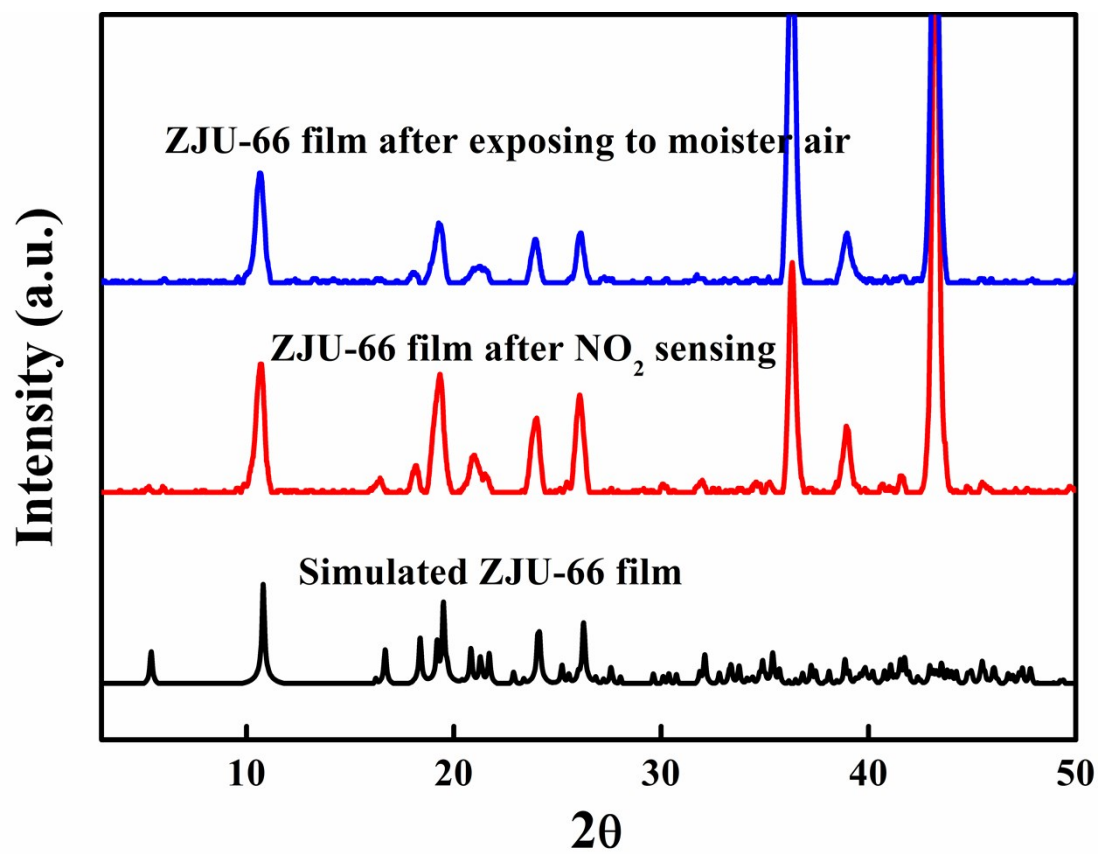

Figure S20. The XRD pattern of ZJU-66 films after NO<sub>2</sub> sensing and exposing to moister air.

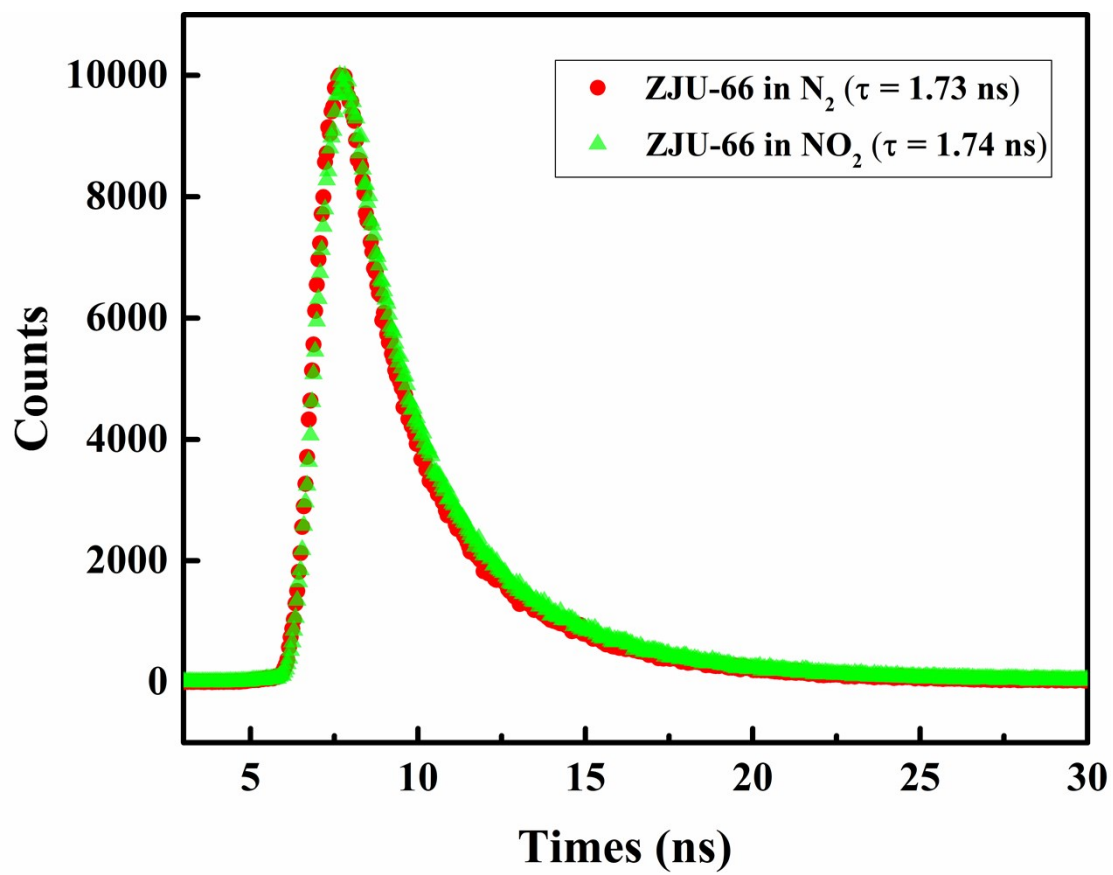

**Figure S21.** Time-resolved fluorescence decay curve of ZJU-66 film in N<sub>2</sub> and NO<sub>2</sub> atmosphere.

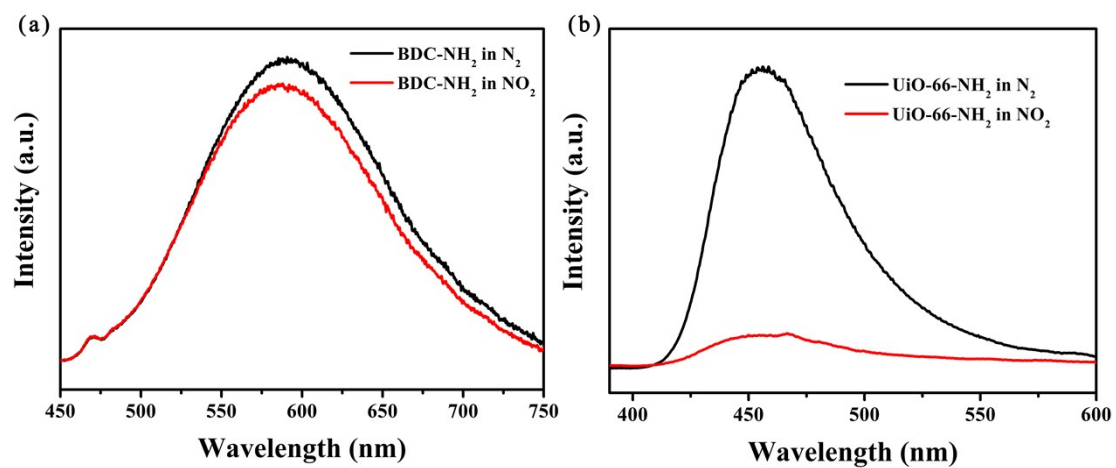

**Figure S22.** The fluorescence emissions of free ligand (a) and UiO-66-NH<sub>2</sub> (b) in absence and presence of NO<sub>2</sub> gas

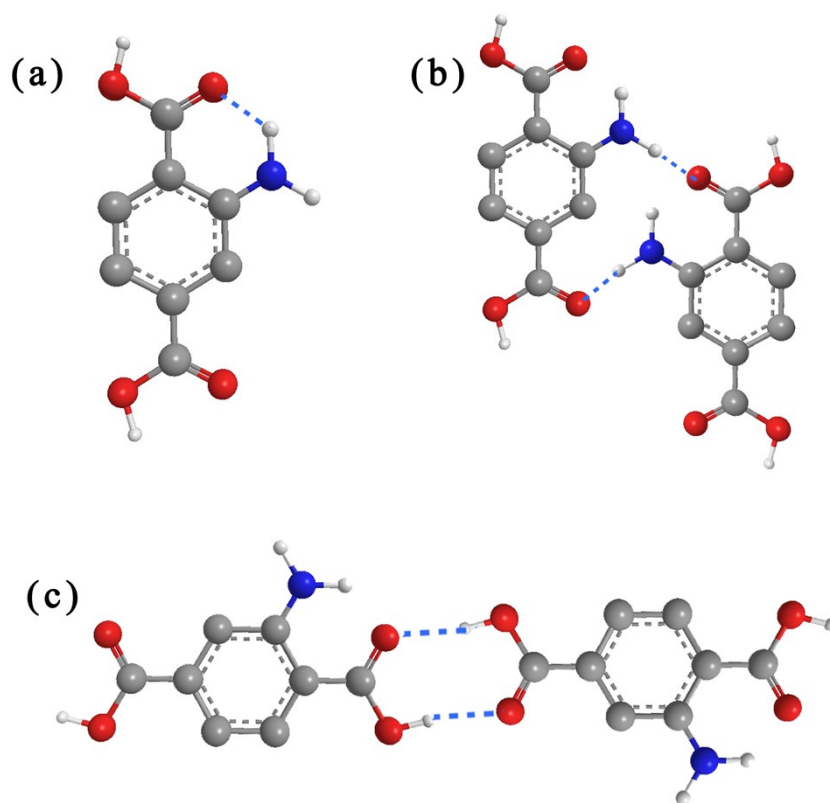

**Figure S23.** Three modes of intramolecular or intermolecular hydrogen bonding in ligands.

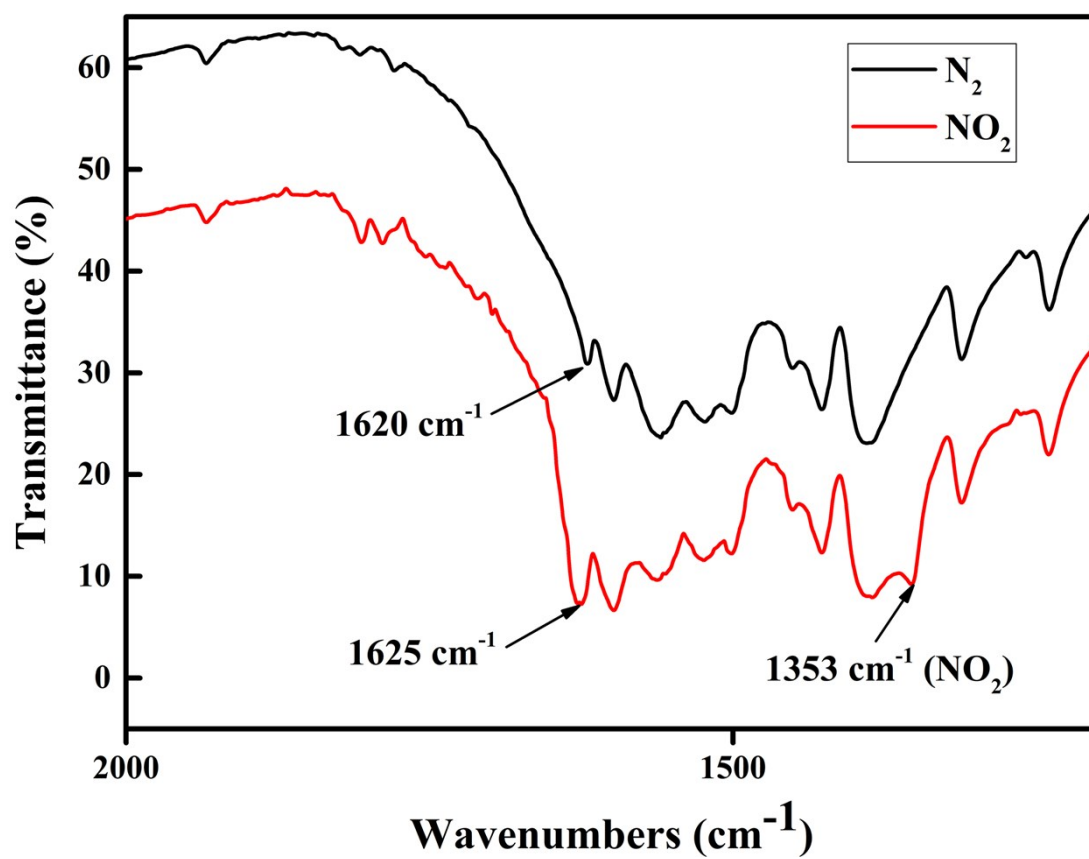

Figure S24. FTIR spectra of ZJU-66 film and the  $\text{NO}_2$  exposed ZJU-66 film.



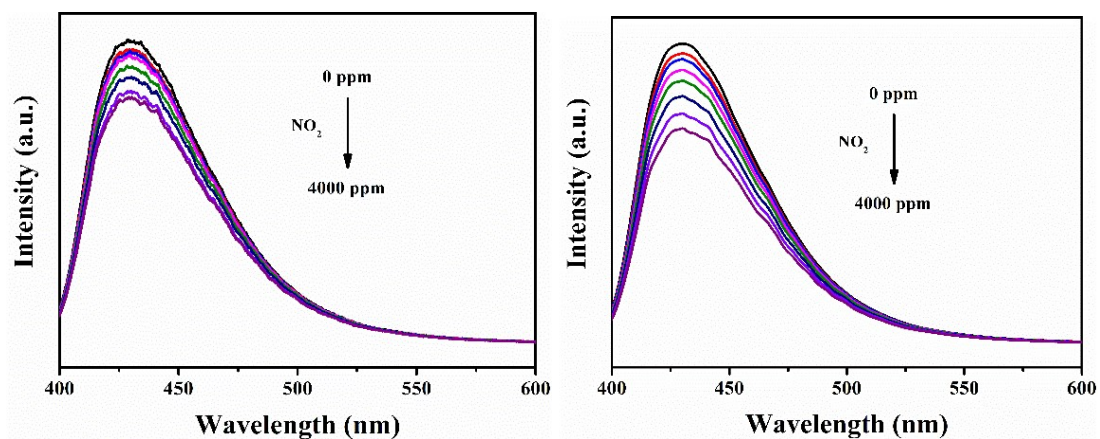

**Figure S25.** NO<sub>2</sub> sensing properties of ZJU-66 film grow for 30 minutes (left) and 3 h (right). ZJU-66 film that only grow for 30 minutes also exhibited sensing ability to NO<sub>2</sub>, however, the quenching efficiency and the curve resolution is in comparable to ZJU-66 film that grow for 3 h.

**Table S1.** Crystallographic data and structure refinement results for ZJU-66.

| Compound                                                              | ZJU-66                                                                        |
|-----------------------------------------------------------------------|-------------------------------------------------------------------------------|
| chemical formula                                                      | C <sub>16</sub> H <sub>12</sub> N <sub>2</sub> O <sub>9</sub> Zn <sub>2</sub> |
| formula weight                                                        | 507.02                                                                        |
| crystal size (mm)                                                     | 0.200×0.200×0.200                                                             |
| temperature (K)                                                       | 173(2)                                                                        |
| radiation                                                             | 1.34139                                                                       |
| crystal system                                                        | Monoclinic                                                                    |
| space group                                                           | C c                                                                           |
| <i>a</i> (Å)                                                          | 32.9307(17)                                                                   |
| <i>b</i> (Å)                                                          | 5.3798(3)                                                                     |
| <i>c</i> (Å)                                                          | 9.1492(5)                                                                     |
| $\alpha$ (°)                                                          | 90                                                                            |
| $\beta$ (°)                                                           | 96.282(2)                                                                     |
| $\gamma$ (°)                                                          | 90                                                                            |
| V(Å <sup>3</sup> )                                                    | 1611.14(15)                                                                   |
| Z                                                                     | 4                                                                             |
| $\rho$ (calc) (g/cm <sup>3</sup> )                                    | 2.090                                                                         |
| F (000)                                                               | 1016                                                                          |
| absorp.coeff. (mm <sup>-1</sup> )                                     | 2.795                                                                         |
| $\theta$ range (deg)                                                  | 2.349 to 63.551                                                               |
| reflns collected                                                      | 6987 (R <sub>int</sub> = 0.0507)                                              |
| indep. reflns                                                         | 3468                                                                          |
| Refns obs. [ <i>I</i> > 2 $\sigma$ ( <i>I</i> )]                      | 3343                                                                          |
| data/restr/paras                                                      | 3468 / 2 / 273                                                                |
| GOF                                                                   | 1.053                                                                         |
| R <sub>1</sub> /wR <sub>2</sub> [ <i>I</i> > 2 $\sigma$ ( <i>I</i> )] | 0.0403 / 0.1073                                                               |
| R <sub>1</sub> /wR <sub>2</sub> (all data)                            | 0.0420 / 0.1095                                                               |
| larg peak and hole(e/Å <sup>3</sup> )                                 | 1.089 / -0.465                                                                |

**Table S2.** The HOMO and LUMO energy level of the BDC-NH<sub>2</sub> monomer in N<sub>2</sub> and NO<sub>2</sub> atmosphere.

| Atmosphere      | HOMO      | LUMO      |
|-----------------|-----------|-----------|
| N <sub>2</sub>  | -6.178 eV | -2.306 eV |
| NO <sub>2</sub> | -7.235 eV | -3.081 eV |
